# Supplementary material for: Improvement of Rotavirus Genotyping Method by Using the Semi-Nested Multiplex-PCR With New Primer Set
Source: PubMed Central journal article supplement (PMC6449864; doi:10.3389/fmicb.2019.00647), 2019-03-29
Supplement: Table_1.pdf [file Table_1.pdf]

Supplementary Table S1. The representative RVA strains used for VP7 genotyping shown in Figure 1.

| Strain name                          | Genotypes |      |     |     |     |     |      |      |      |      |      | Remarks                    | Acc. No.<br>of VP7 |
|--------------------------------------|-----------|------|-----|-----|-----|-----|------|------|------|------|------|----------------------------|--------------------|
|                                      | VP7       | VP4  | VP6 | VP1 | VP2 | VP3 | NSP1 | NSP2 | NSP3 | NSP4 | NSP5 |                            |                    |
| RVA/Human-wt/JPN/SP15-09/2015/G1P[8] | G1        | P[8] | I1  | R1  | C1  | M1  | A1   | N1   | N1   | E1   | H1   | G1 lineage 1 (Wa-like)     | LC311226           |
| RVA/Human-wt/JPN/NT036/2013/G1P[8]   | G1        | P[8] | I1  | R1  | C1  | M1  | A1   | N1   | N1   | E1   | H1   | G1 lineage 2 (Wa-like)     | LC172271           |
| RVA/Human-wt/JPN/SP15-06/2015/G1P[8] | G1        | P[8] | I2  | R2  | C2  | M2  | A2   | N2   | T2   | E2   | H2   | G1 lineage 1 (DS-1-like)   | LC311225           |
| RVA/Human-wt/JPN/To16-04/2016/G2P[4] | G2        | P[4] | I2  | R2  | C2  | M2  | A2   | N2   | T2   | E2   | H2   |                            | LC311229           |
| RVA/Human-wt/JPN/KN105/2013/G3P[8]   | G3        | P[8] | I1  | R1  | C1  | M1  | A1   | N1   | N1   | E1   | H1   | Human typical G3 (Wa-like) | LC172317           |
| RVA/Human-wt/JPN/To16-01/2016/G3P[8] | G3        | P[8] | I2  | R2  | C2  | M2  | A2   | N2   | N2   | E2   | H2   | Equine-like G3 (DS-1-like) | LC311227           |
| RVA/Human-wt/JPN/OH279/2002/G4P[8]   | G4        | P[8] | I1  | R1  | C1  | M1  | A1   | N1   | N1   | E1   | H1   |                            | LC311231           |
| RVA/Human-wt/JPN/TA15-07/2015/G8P[8] | G8        | P[8] | I2  | R2  | C2  | M2  | A2   | N2   | N2   | E2   | H2   |                            | LC311230           |
| RVA/Human-wt/JPN/To14-25/2014/G9P[8] | G9        | P[8] | I1  | R1  | C1  | M1  | A1   | N1   | N1   | E1   | H1   | G9 lineage3                | LC105292           |
| RVA/Human-wt/JPN/To16-02/2016/G9P[8] | G9        | P[8] | I1  | R1  | C1  | M1  | A1   | N1   | N1   | E1   | H1   | G9 lineage6                | LC311228           |
| RVA/Human-wt/JPN/NS17-5/2017/G12P[8] | G12       | P[8] | I1  | R1  | C1  | M1  | A1   | N1   | T1   | E1   | H1   |                            | LC426752           |
